# Supplementary material for: Comprehensive Mining and Characterization of CRISPR-Cas Systems in Bifidobacterium
Source: PubMed Central journal article supplement (PMC7284854; doi:10.3390/microorganisms8050720), 2020-05-12
Supplement: microorganisms-08-00720-s001.pdf [file microorganisms-08-00720-s001.pdf]

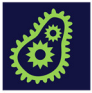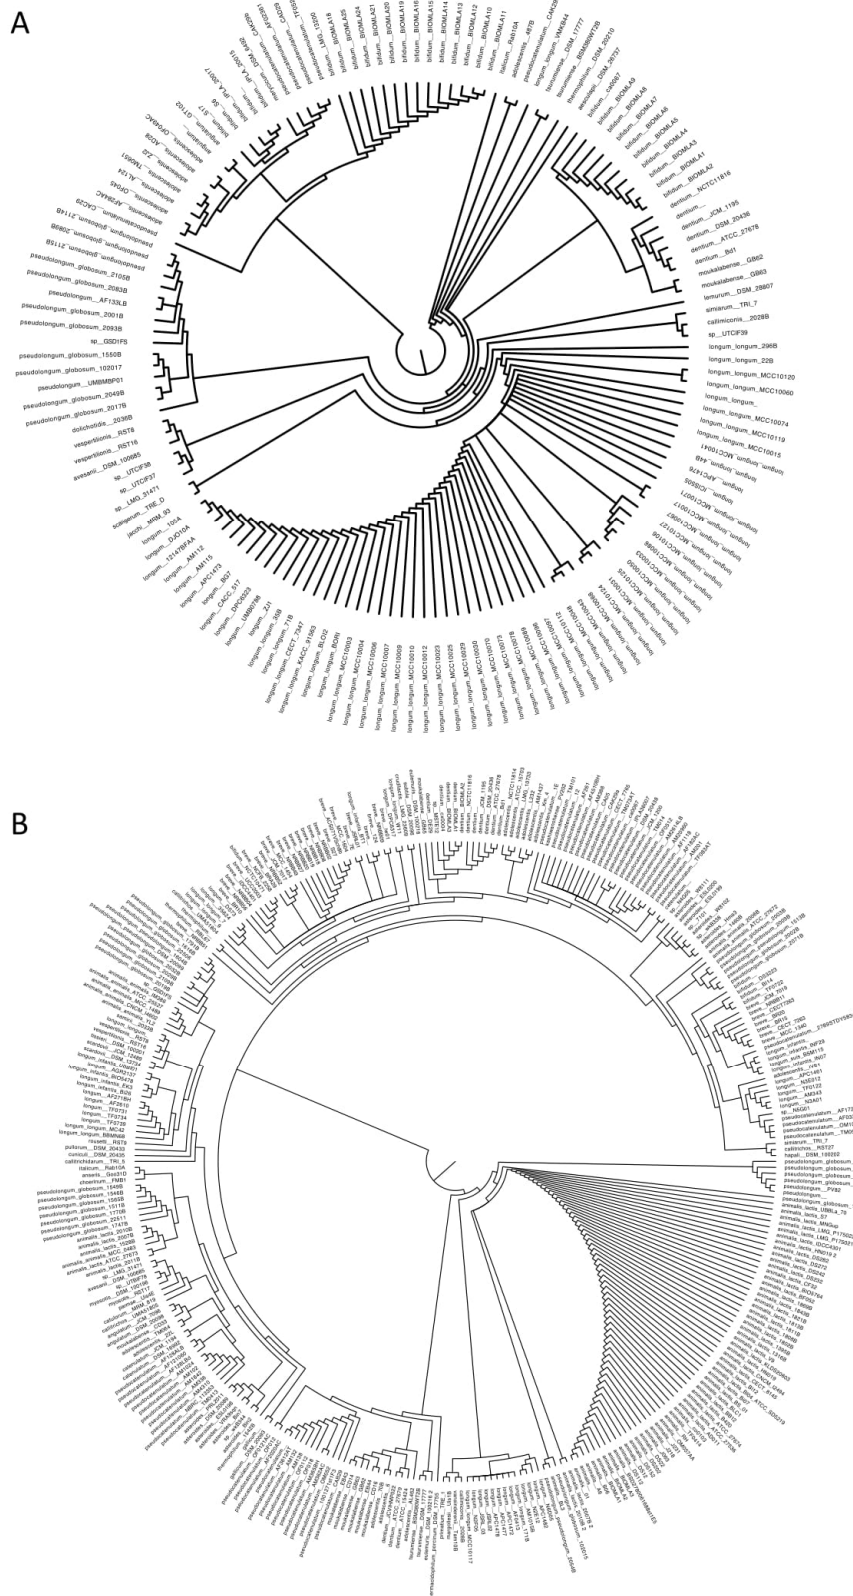

**Figure S1:** Phylogenetic analyses based on the amino acid sequences of (A) Cas 9 protein and (B) Cas3 protein in *Bifidobacterium*, with taxa names shown. The amino acid sequences were aligned using the MUSCLE alignment algorithm to generate neighbor-joining consensus trees based on the Jukes-Cantor model.
